# Supplementary material for: Microstructure evolution of diazonium functionalized graphene: A potential approach to change graphene electronic structure
Source: Royal Society of Chemistry journal article supplement (doi:10.1039/c1jm14862a), 2011-12-12
Supplement: c1jm14862a.pdf [file c1jm14862a.pdf]

## Supporting Information

### **Microstructure Evolution of Diazonium Functionalized Graphene: A Potential Approach to Tune Graphene Electronic Structure**

*Huarui Zhu,<sup>§</sup> Ping Huang,<sup>§</sup> Long Jing, Taisen Zuo, Yuliang Zhao, and Xueyun Gao\**

*CAS Key Laboratory for Biomedical Effect of Nanomaterials and Nanosafety,  
Institute of High Energy Physics, Chinese Academy of Sciences, Beijing 100049, P. R.  
China*

E-mail: gaoxy@ihep.ac.cn

<sup>§</sup> These authors contributed equally

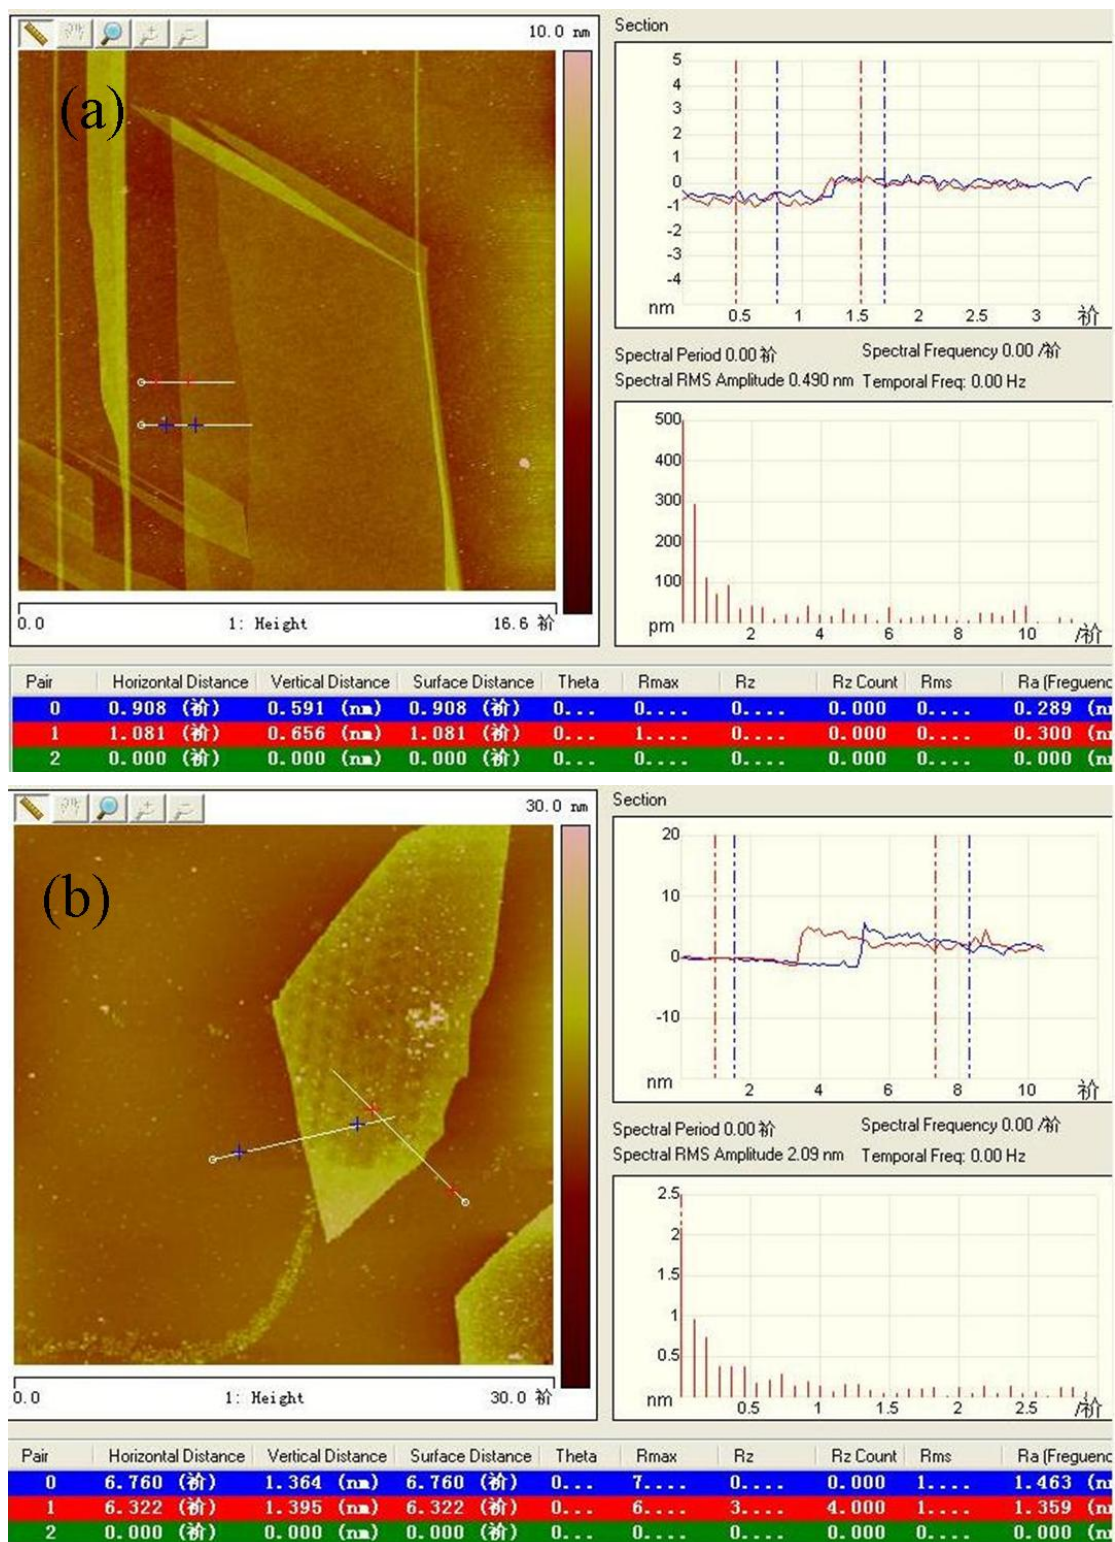

**Figure S1.** AFM height images of (a) pristine and (b) modified monolayer graphene.

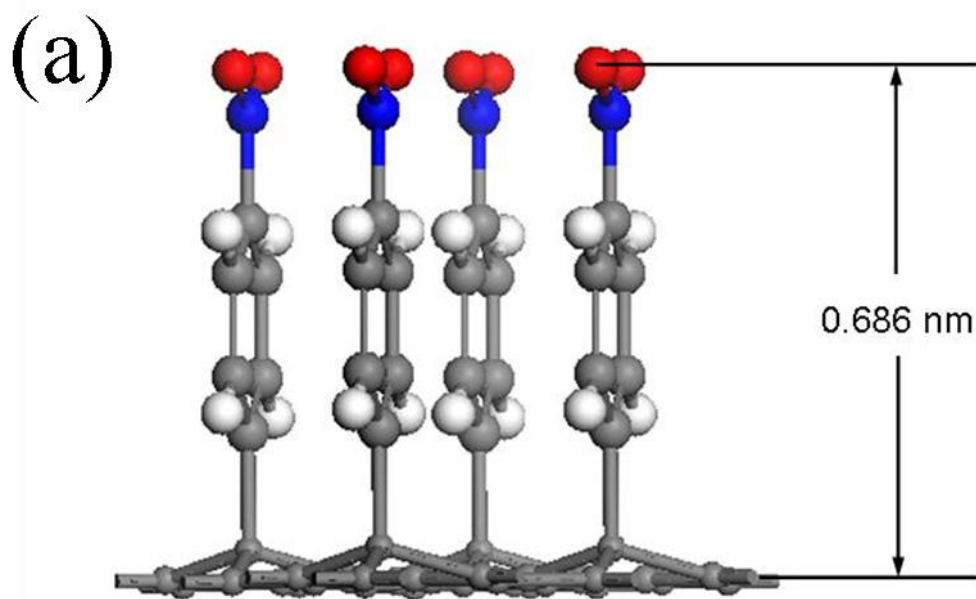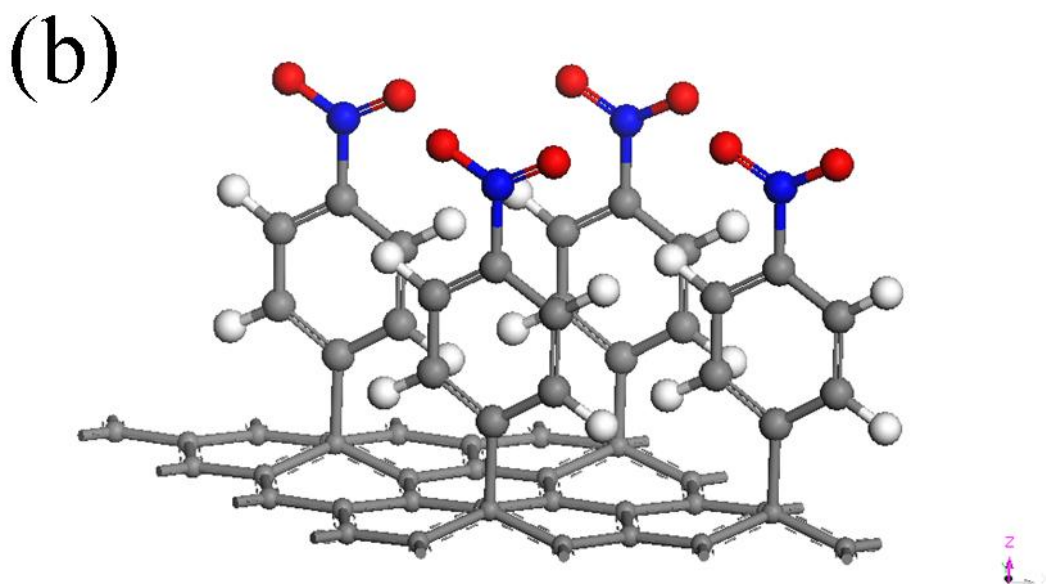

**Figure S2.** Side view of an atomic model for nitrophenyl group functionalized graphene. The grey balls represent C atoms, while the blue, red, and white ones present N atoms, O atoms, H atoms respectively.

**Table S1.** The base plane crystal lattice constant of functionalized graphene at different reaction times and different concentrations of 4-NPD

|                       | Sample 0 | Sample 1 | Sample 2 | Sample 3 | Sample 4 | Sample 5      |
|-----------------------|----------|----------|----------|----------|----------|---------------|
| $t_{\text{reaction}}$ | ----     | 5h       | 10 h     | 10 h     | 25 h     | <u>25h</u>    |
| $C_{4\text{-NPD}}$    | ----     | 10 mM    | 15 mM    | 20 mM    | 35 mM    | <u>20 mM</u>  |
| $d$                   | 2.46 Å   | 2.50 Å   | 2.54 Å   | 2.58 Å   | 2.42 Å   | <u>2.44 Å</u> |

$t_{\text{reaction}}$  : the reaction time;  $C_{4\text{-NPD}}$ : the concentration of 4-NPD;  $d$ : the base plane crystal lattice constant of functionalized graphene.

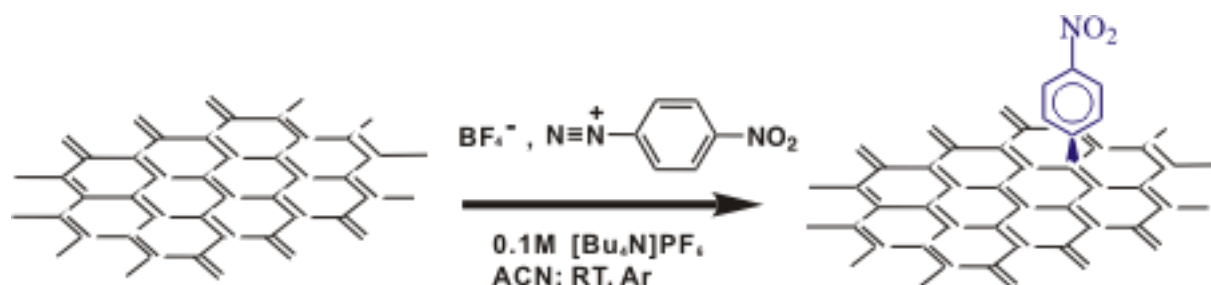

**Scheme S1.** Reaction between Graphene and 4-nitrophenyl diazonium, the nitrophenyl groups were bonded with nearly perpendicular configuration.
